# Supplementary material for: Single-cell immune escape correlation analysis: unraveling the prognostic influence of intercellular communication in the tumor microenvironment of colorectal cancer
Source: publisher site journal article supplement (doi:10.18632/aging.205978), 2024-06-29
Supplement: Supplementary file 1 [file aging-v16-205978-supplementary-material-SD1.pdf]

# SUPPLEMENTARY FIGURE

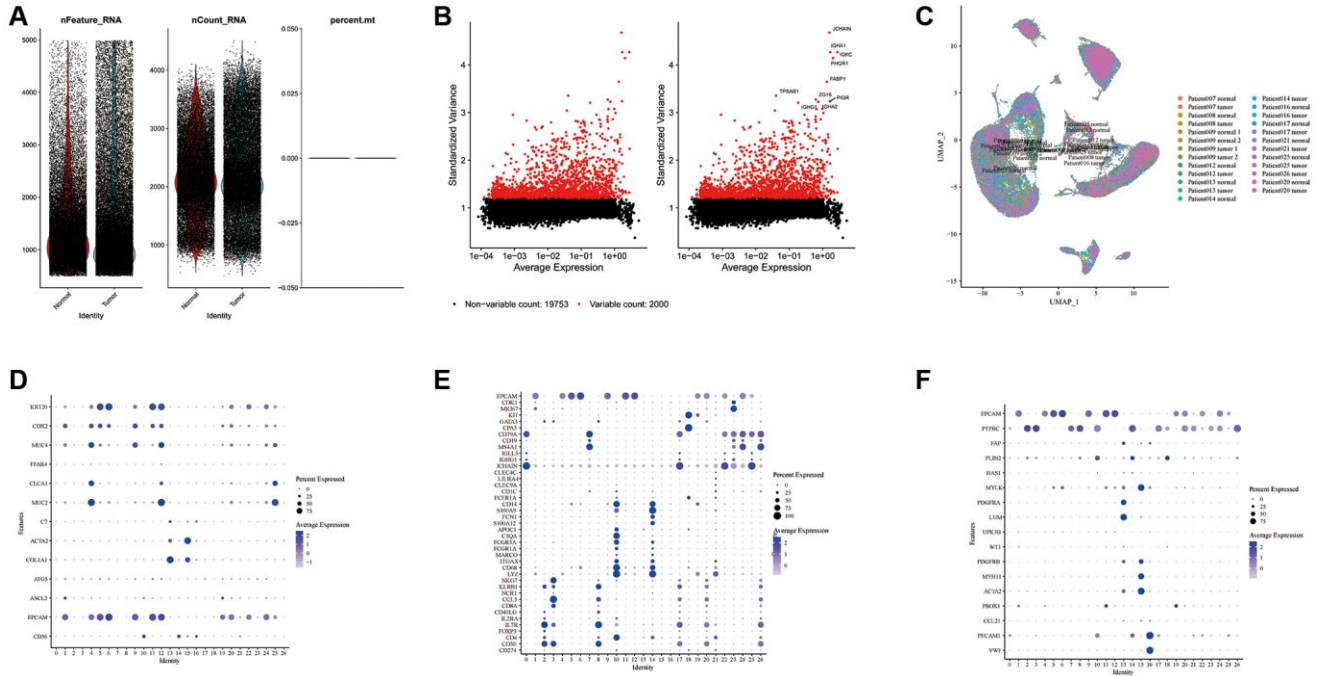

**Supplementary Figure 1. Single-cell quality control process. (A)** Gene, mitochondrial, and cell count after the accusation. **(B)** Selection of 2000 highly variable genes for subsequent analysis. **(C)** Visualization of sample distribution using UMAP after harmonizing cells. **(D–F)** Identification of marker genes for cell annotation.
